# Supplementary material for: Cognitive Impairment and Insomnia in Celiac Disease: A Systematic Review and Meta-Analysis
Source: PubMed Central journal article supplement — Gut Liver. 2024 Aug 1;18(6):1080–4. doi: 10.5009/gnl240063 (PMC11564999; doi:10.5009/gnl240063), 2024-08-01
Supplement: gnl-18-6-1080-supple.pdf [file gnl-18-6-1080-supple.pdf]

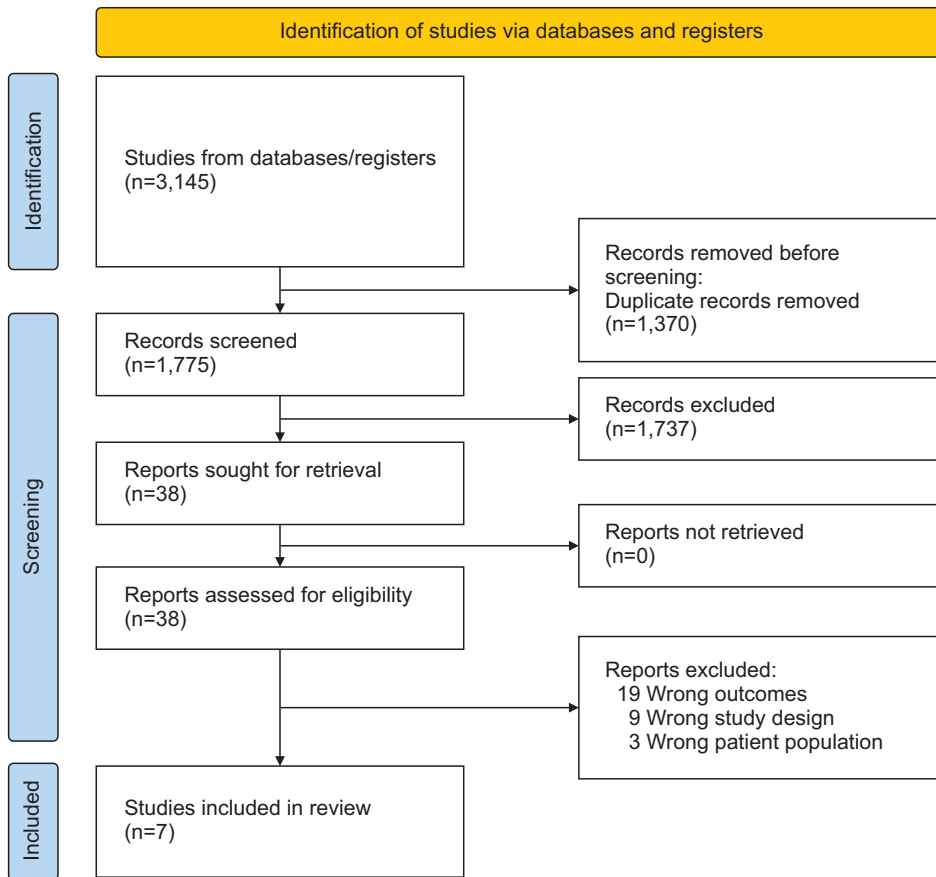

**Supplementary Fig. 1.** Flowchart of the systematic review search process.<sup>1</sup>

## REFERENCES

1. Page MJ, McKenzie JE, Bossuyt PM, et al. The PRISMA 2020 statement: an updated guideline for reporting systematic reviews. *BMJ* 2021;372:n71.

**Supplementary Material 1.** Search strategy for databases included.

**Ovid MEDLINE(R) ALL <1946 to November 10, 2023>** (Run on November 13, 2023, 283 results)

- 1 celiac disease/ 22017
- 2 Glutens/ 7456
- 3 Diet, Gluten-Free/ 3051
- 4 ((celiac or coeliac) adj3 (disease or sprue or syndrome)).ti,ab,kf.21853
- 5 ((gluten\* adj3 (enteropath\* or induced or intolerance or sensitiv\*)) or "gluten-free diet").ti,ab,kf. 7756
- 6 or/1-5 31991
- 7 Neurocognitive Disorders/ 9793
- 8 Cognitive Dysfunction/ 37304
- 9 exp Cognition Disorders/ 117873
- 10 Mental Fatigue/1868
- 11 Fatigue Syndrome, Chronic/ 6238
- 12 Consciousness/ or Consciousness Disorders/ 16660
- 13 Cognitive Dissonance/ 828
- 14 exp Amnesia/ 9043
- 15 Memory/ 72337
- 16 Executive Function/ 19881
- 17 Processing Speed/ 102
- 18 exp Problem Solving/ 30610
- 19 Decision Making/ or Judgment/ 124354
- 20 Comprehension/ 17437
- 21 ((neurocognitive or neuro-cognitive) adj3 (dysfunction or disorder\* or impairment\* or symptom\* or syndrome)).ti,ab,kf. 9706
- 22 ((cognitive or cognition) adj3 (defect\* or deficit\* or disabilit\* or dissonance\* or dysfunction\* or disorder\* or impairment\* or syndrome\*)).ti,ab,kf. 155019
- 23 (fatigue adj3 (chronic or disorder\* or multidimensional or severe or syndrome\* or unidimensional)).ti,ab,kf. 14313
- 24 ((brain or cognitive or mental or mind) adj3 (fatigue or tiredness or exhaustion)).ti,ab,kf. 5905
- 25 ((brain or cognitive or mental or mind) adj3 (fog or fogginess or foggy or fuzzy)).ti,ab,kf. 820
- 26 ((clouded or cloudy or clouding) adj3 (consciousness or mind or mental)).ti,ab,kf. 288
- 27 consciousness\*.ti,ab,kf. 45859

- 28 (((effect or effects or factor\* or process\*) and (amnesia\* or amnesic or forgetting or memory or memorizing or remembering or reminiscence or mental recall)) or (memory deficit or memory loss or memory disorder\*)).ti,ab,kf. 199774
- 29 ("cognitive control" or "executive control" or "executive function").ti,ab,kf. 34781
- 30 (processing adj3 (rate or velocity or speed)).ti,ab,kf. 14918
- 31 ((effect or effects or factor\* or process\*) and (problem solving or decision or judgment\* or judgement\* or choice making or decisionmaking or judgement\* or judgment\*)).ti,ab,kf. 227867
- 32 ((mental or cognitive or intellectual or passive or psychological or perceptual or cerebral or brain) adj3 (comprehension or understanding or readability)).ti,ab,kf. 13009
- 33 exp "Sleep Initiation and Maintenance Disorders"/ 18142
- 34 "Sleep Wake Disorders"/ 27484
- 35 Sleep Quality/ 1784
- 36 Dyssomnias/ or "Sleep Deprivation"/ or "Sleep Disorders, Circadian Rhythm"/ or "Sleep Disorders, Intrinsic"/ 13795
- 37 Parasomnias/ or exp "REM Sleep Parasomnias"/ or "Sleep-Wake Transition Disorders"/ 2902
- 38 "Disorders of Excessive Somnolence"/ 4413
- 39 "Nocturnal Myoclonus Syndrome"/ 679
- 40 exp "Sleep Apnea Syndromes"/ 43793
- 41 (sleep\* adj3 (behav\* or deficit or deprivation or difficul\* or disorder\* or disrupt\* or disturb\* or duration or impairment or inability or initiation or issue\* or problem\* or maintenance or practice\* or quality or recovery or resistance)).ti,ab,kf. 111114
- 42 (dyssomnia\* or insomnia\* or parasomnia\*).ti,ab,kf. 32080
- 43 (rapid eye movement behav\* or "RBD" or REM behavior disorder\* or REM behav\* or REM sleep behav\*).ti,ab,kf. 9589
- 44 (circadian rhythm\* or circadian variation or diurnal cycle or diurnal fluctuation or diurnal pattern or diurnal rhythm\* or diurnal variation or nyctohemeral or nycthemeral or twenty-four hour rhythm\*).ti,ab,kf. 46215
- 45 (myoclonus during sleep or nocturnal myoclonus or nocturnal myoclonus syndrome or periodic leg movement\* or periodic limb movement\* or "PLMD" or "PLMS" or sleep myoclonus).ti,ab,kf. 2443
- 46 (obstructive apnea\* or obstructive apnoe\* or sleep apnea or sleep apno\* or sleep hypopnea\* or sleep-disordered breathing or "OSAHS").ti,ab,kf. 52305
- 47 (Waking-up or ((early or sleep\* or night\* or nocturnal or prolonged) adj3 (awake\* or wake\* or waking\* or awaking))).ti,ab,kf. 29661
- 48 (poor sleep or sleep qualit\*).ti,ab,kf. 27452
- 49 (hypersomnolence or somnolence or sleepiness).ti,ab,kf. 24740

50 or/7-49 1090802  
51 6 and 50 283

**Embase (Ovid) <1974 to 2023 November 10> (Run on November 13, 2023, 1231 results)**

- 1 celiac disease/ 36815
- 2 Gluten/ 10991
- 3 gluten free diet/11110
- 4 ((celiac or coeliac) adj3 (disease or sprue or syndrome)).ti,ab,kf.32257
- 5 ((gluten\* adj3 (enteropath\* or induced or intolerance or sensitiv\*)) or "gluten-free diet").ti,ab,kf. 11725
- 6 or/1-5 46206
- 7 disorders of higher cerebral function/ 3433
- 8 cognitive defect/ 217803
- 9 mild cognitive impairment/ 37693
- 10 Mental Fatigue/693
- 11 chronic fatigue syndrome/ 12186
- 12 Consciousness/ or consciousness disorder/ 53612
- 13 cognition/ 303642
- 14 exp Amnesia/ 49294
- 15 Memory/ 161498
- 16 Executive Function/ 56811
- 17 Processing Speed/ 5972
- 18 exp Problem Solving/ 42900
- 19 Decision Making/ 285252
- 20 Comprehension/ 36231
- 21 ((neurocognitive or neuro-cognitive) adj3 (dysfunction or disorder\* or impairment\* or symptom\* or syndrome)).ti,ab,kf. 14800
- 22 ((cognitive or cognition) adj3 (defect\* or deficit\* or disabilit\* or dissonance\* or dysfunction\* or disorder\* or impairment\* or syndrome\*)).ti,ab,kf. 231914
- 23 (fatigue adj3 (chronic or disorder\* or multidimensional or severe or syndrome\* or unidimensional)).ti,ab,kf. 21603
- 24 ((brain or cognitive or mental or mind) adj3 (fatigue or tiredness or exhaustion)).ti,ab,kf. 8953
- 25 ((brain or cognitive or mental or mind) adj3 (fog or fogginess or foggy or fuzzy)).ti,ab,kf. 1319
- 26 ((clouded or cloudy or clouding) adj3 (consciousness or mind or mental)).ti,ab,kf. 447
- 27 consciousness\*.ti,ab,kf. 65966

- 28 (((effect or effects or factor\* or process\*) and (amnesia\* or amnesic or forgetting or memory or memorizing or remembering or reminiscence or mental recall)) or (memory deficit or memory loss or memory disorder\*)).ti,ab,kf. 261739
- 29 ("cognitive control" or "executive control" or "executive function").ti,ab,kf. 47518
- 30 (processing adj3 (rate or velocity or speed)).ti,ab,kf. 21307
- 31 ((effect or effects or factor\* or process\*) and (problem solving or decision or judgment\* or judgement\* or choice making or decisionmaking or judgement\* or judgment\*)).ti,ab,kf. 305067
- 32 ((mental or cognitive or intellectual or passive or psychological or perceptual or cerebral or brain) adj3 (comprehension or understanding or readability)).ti,ab,kf. 16025
- 33 exp Insomnia/ 87356
- 34 Sleep Disorder/ 87886
- 35 Sleep Quality/ 39102
- 36 Dyssomnia/ or "Sleep Deprivation"/ or "circadian rhythm sleep disorder"/ or "intrinsic sleep disorder"/ 102977
- 37 Parasomnia/ or exp "REM Sleep Parasomnia"/ or "sleep-wake transition disorder"/ 8647
- 38 "disorders of excessive somnolence"/ 25490
- 39 "periodic limb movement disorder"/ 3176
- 40 exp "sleep apnea syndromes"/ 69330
- 41 (sleep\* adj3 (behav\* or deficit or deprivation or difficul\* or disorder\* or disrupt\* or disturb\* or duration or impairment or inability or initiation or issue\* or problem\* or maintenance or practice\* or quality or recovery or resistance)).ti,ab,kf. 173044
- 42 (dyssomnia\* or insomnia\* or parasomnia\*).ti,ab,kf. 53860
- 43 (rapid eye movement behav\* or "RBD" or REM behavior disorder\* or REM behav\* or REM sleep behav\*).ti,ab,kf. 13497
- 44 (circadian rhythm\* or circadian variation or diurnal cycle or diurnal fluctuation or diurnal pattern or diurnal rhythm\* or diurnal variation or nyctohemeral or nycthemeral or twenty-four hour rhythm\*).ti,ab,kf. 60966
- 45 (myoclonus during sleep or nocturnal myoclonus or nocturnal myoclonus syndrome or periodic leg movement\* or periodic limb movement\* or "PLMD" or "PLMS" or sleep myoclonus).ti,ab,kf. 4353
- 46 (obstructive apnea\* or obstructive apnoe\* or sleep apnea or sleep apno\* or sleep hypopnea\* or sleep-disordered breathing or "OSAHS").ti,ab,kf. 87477
- 47 (Waking-up or ((early or sleep\* or night\* or nocturnal or prolonged) adj3 (awake\* or wake\* or waking\* or awaking))).ti,ab,kf. 45990
- 48 (poor sleep or sleep qualit\*).ti,ab,kf. 43452
- 49 (hypersomnolence or somnolence or sleepiness).ti,ab,kf. 44627

50 or/7-49 1863223

51 6 and 50 1231

**Cochrane Library** (Run on November 13, 2023, 57 results)

- #1 [mh ^"celiac disease"] 512
- #2 [mh ^Glutens] 169
- #3 [mh ^"Diet, Gluten-Free"] 136
- #4 ((celiac:ti,ab,kw OR coeliac:ti,ab,kw) NEAR/3 (disease:ti,ab,kw OR sprue:ti,ab,kw OR syndrome:ti,ab,kw)) 1025
- #5 ((gluten\*:ti,ab,kw NEAR/3 (enteropath\*:ti,ab,kw OR induced:ti,ab,kw OR intolerance:ti,ab,kw OR sensitiv\*:ti,ab,kw)) OR "gluten-free diet":ti,ab,kw) 633
- #6 #1 OR #2 OR #3 OR #4 OR #5 1213
- #7 [mh ^"Neurocognitive Disorders"] 244
- #8 [mh ^"Cognitive Dysfunction"] 3070
- #9 [mh "Cognition Disorders"] 7340
- #10 [mh ^"Mental Fatigue"]253
- #11 [mh ^"Fatigue Syndrome, Chronic"] 505
- #12 [mh ^Consciousness] OR [mh ^"Consciousness Disorders"] 739
- #13 [mh ^"Cognitive Dissonance"] 107
- #14 [mh Amnesia] 473
- #15 [mh ^Memory] 4659
- #16 [mh ^"Executive Function"] 2167
- #17 [mh ^"Processing Speed"] 57
- #18 [mh "Problem Solving"] 2030
- #19 [mh ^"Decision Making"] OR [mh ^Judgment] 4316
- #20 [mh ^Comprehension] 941
- #21 ((neurocognitive:ti,ab,kw OR neuro-cognitive:ti,ab,kw) NEAR/3 (dysfunction:ti,ab,kw OR disorder\*:ti,ab,kw OR impairment\*:ti,ab,kw OR symptom\*:ti,ab,kw OR syndrome:ti,ab,kw)) 1284
- #22 ((cognitive:ti,ab,kw OR cognition:ti,ab,kw) NEAR/3 (defect\*:ti,ab,kw OR deficit\*:ti,ab,kw OR disabilit\*:ti,ab,kw OR dissonance\*:ti,ab,kw OR dysfunction\*:ti,ab,kw OR disorder\*:ti,ab,kw OR impairment\*:ti,ab,kw OR syndrome\*:ti,ab,kw)) 25627
- #23 (fatigue:ti,ab,kw NEAR/3 (chronic:ti,ab,kw OR disorder\*:ti,ab,kw OR multidimensional:ti,ab,kw OR severe:ti,ab,kw OR syndrome\*:ti,ab,kw OR unidimensional:ti,ab,kw)) 4305
- #24 ((brain:ti,ab,kw OR cognitive:ti,ab,kw OR mental:ti,ab,kw OR mind:ti,ab,kw) NEAR/3 (fatigue:ti,ab,kw OR tiredness:ti,ab,kw OR exhaustion:ti,ab,kw)) 1855
- #25 ((brain:ti,ab,kw OR cognitive:ti,ab,kw OR mental:ti,ab,kw OR mind:ti,ab,kw) NEAR/3 (fog:ti,ab,kw OR fogginess:ti,ab,kw OR foggy:ti,ab,kw OR fuzzy:ti,ab,kw)) 100



#26 ((clouded:ti,ab,kw OR cloudy:ti,ab,kw OR clouding:ti,ab,kw) NEAR/3  
(consciousness:ti,ab,kw OR mind:ti,ab,kw OR mental:ti,ab,kw))14

#27 consciousness\*:ti,ab,kw 6435

#28 (((effect:ti,ab,kw OR effects:ti,ab,kw OR factor\*:ti,ab,kw OR process\*:ti,ab,kw) AND  
(amnesia\*:ti,ab,kw OR amnesic:ti,ab,kw OR forgetting:ti,ab,kw OR memory:ti,ab,kw OR  
memorizing:ti,ab,kw OR remembering:ti,ab,kw OR reminiscence:ti,ab,kw OR "mental  
recall":ti,ab,kw)) OR ("memory deficit":ti,ab,kw OR "memory loss":ti,ab,kw OR ("memory" NEXT  
disorder\*):ti,ab,kw)) 25948

#29 ("cognitive control":ti,ab,kw OR "executive control":ti,ab,kw OR "executive  
function":ti,ab,kw) 7750

#30 (processing:ti,ab,kw NEAR/3 (rate:ti,ab,kw OR velocity:ti,ab,kw OR speed:ti,ab,kw)) 2599

#31 ((effect:ti,ab,kw OR effects:ti,ab,kw OR factor\*:ti,ab,kw OR process\*:ti,ab,kw) AND  
("problem solving":ti,ab,kw OR decision:ti,ab,kw OR judgment\*:ti,ab,kw OR judgement\*:ti,ab,kw  
OR "choice making":ti,ab,kw OR decisionmaking:ti,ab,kw OR judgement\*:ti,ab,kw OR  
judgment\*:ti,ab,kw)) 28538

#32 ((mental:ti,ab,kw OR cognitive:ti,ab,kw OR intellectual:ti,ab,kw OR passive:ti,ab,kw OR  
psychological:ti,ab,kw OR perceptual:ti,ab,kw OR cerebral:ti,ab,kw OR brain:ti,ab,kw) NEAR/3  
(comprehension:ti,ab,kw OR understanding:ti,ab,kw OR readability:ti,ab,kw)) 576

#33 [mh "Sleep Initiation and Maintenance Disorders"] 3357

#34 [mh ^"Sleep Wake Disorders"] 2177

#35 [mh ^"Sleep Quality"] 849

#36 [mh ^Dyssomnias] OR [mh ^"Sleep Deprivation"] OR [mh ^"Sleep Disorders, Circadian  
Rhythm"] OR [mh ^"Sleep Disorders, Intrinsic"] 1639

#37 [mh ^Parasomnias] OR [mh "REM Sleep Parasomnias"] OR [mh ^"Sleep-Wake Transition  
Disorders"] 561

#38 [mh ^"Disorders of Excessive Somnolence"] 381

#39 [mh ^"Nocturnal Myoclonus Syndrome"] 21

#40 [mh "Sleep Apnea Syndromes"]3525

#41 (sleep\*:ti,ab,kw NEAR/3 (behav\*:ti,ab,kw OR deficit:ti,ab,kw OR deprivation:ti,ab,kw OR  
difficul\*:ti,ab,kw OR disorder\*:ti,ab,kw OR disrupt\*:ti,ab,kw OR disturb\*:ti,ab,kw OR  
duration:ti,ab,kw OR impairment:ti,ab,kw OR inability:ti,ab,kw OR initiation:ti,ab,kw OR  
issue\*:ti,ab,kw OR problem\*:ti,ab,kw OR maintenance:ti,ab,kw OR practice\*:ti,ab,kw OR  
quality:ti,ab,kw OR recovery:ti,ab,kw OR resistance:ti,ab,kw)) 32769

#42 (dyssomnia\*:ti,ab,kw OR insomnia\*:ti,ab,kw OR parasomnia\*:ti,ab,kw) 14689

- #43 ("rapid eye movement" NEXT behav\*):ti,ab,kw OR RBD:ti,ab,kw OR ("REM behavior" NEXT disorder\*):ti,ab,kw OR ("REM" NEXT behav\*):ti,ab,kw OR ("REM sleep" NEXT behav\*):ti,ab,kw) 484
- #44 (("circadian" NEXT rhythm\*):ti,ab,kw OR "circadian variation":ti,ab,kw OR "diurnal cycle":ti,ab,kw OR "diurnal fluctuation":ti,ab,kw OR "diurnal pattern":ti,ab,kw OR ("diurnal" NEXT rhythm\*):ti,ab,kw OR "diurnal variation":ti,ab,kw OR nyctohemeral:ti,ab,kw OR nycthemeral:ti,ab,kw OR ("twenty-four hour" NEXT rhythm\*):ti,ab,kw) 6174
- #45 ("myoclonus during sleep":ti,ab,kw OR "nocturnal myoclonus":ti,ab,kw OR "nocturnal myoclonus syndrome":ti,ab,kw OR ("periodic leg" NEXT movement\*):ti,ab,kw OR ("periodic limb" NEXT movement\*):ti,ab,kw OR PLMD:ti,ab,kw OR PLMS:ti,ab,kw OR "sleep myoclonus":ti,ab,kw) 272
- #46 (("obstructive" NEXT apnea\*):ti,ab,kw OR ("obstructive" NEXT apnoe\*):ti,ab,kw OR "sleep apnea":ti,ab,kw OR ("sleep" NEXT apno\*):ti,ab,kw OR ("sleep" NEXT hypopnea\*):ti,ab,kw OR "sleep-disordered breathing":ti,ab,kw OR OSAHS:ti,ab,kw) 8919
- #47 (Waking-up:ti,ab,kw OR ((early:ti,ab,kw OR sleep\*:ti,ab,kw OR night\*:ti,ab,kw OR nocturnal:ti,ab,kw OR prolonged:ti,ab,kw) NEAR/3 (awake\*:ti,ab,kw OR wake\*:ti,ab,kw OR waking\*:ti,ab,kw OR awaking:ti,ab,kw))) 7785
- #48 ("poor sleep":ti,ab,kw OR ("sleep" NEXT qualit\*):ti,ab,kw) 13284
- #49 (hypersomnolence:ti,ab,kw OR somnolence:ti,ab,kw OR sleepiness:ti,ab,kw) 11636
- #50 #7 OR #8 OR #9 OR #10 OR #11 OR #12 OR #13 OR #14 OR #15 OR #16 OR #17 OR #18 OR #19 OR #20 OR #21 OR #22 OR #23 OR #24 OR #25 OR #26 OR #27 OR #28 OR #29 OR #30 OR #31 OR #32 OR #33 OR #34 OR #35 OR #36 OR #37 OR #38 OR #39 OR #40 OR #41 OR #42 OR #43 OR #44 OR #45 OR #46 OR #47 OR #48 OR #49 141175
- #51 #6 AND #50 57

**CINAHL Complete** (Run on November 13, 2023, 175 citations)

| #  | Query                                                                                      | Limiters/Expanders                                                           | Last Run Via                                                                                                                   | Results |
|----|--------------------------------------------------------------------------------------------|------------------------------------------------------------------------------|--------------------------------------------------------------------------------------------------------------------------------|---------|
| S1 | (MH "celiac disease")                                                                      | Expanders - Apply<br>equivalent subjects<br>Search modes -<br>Boolean/Phrase | Interface -<br>EBSCOhost<br>Research<br>Databases<br>Search Screen<br>- Advanced<br>Search<br>Database -<br>CINAHL<br>Complete | 5,677   |
| S2 | (MH Gluten)                                                                                | Expanders - Apply<br>equivalent subjects<br>Search modes -<br>Boolean/Phrase | Interface -<br>EBSCOhost<br>Research<br>Databases<br>Search Screen<br>- Advanced<br>Search<br>Database -<br>CINAHL<br>Complete | 1,544   |
| S3 | (MH "Diet, Gluten-Free")                                                                   | Expanders - Apply<br>equivalent subjects<br>Search modes -<br>Boolean/Phrase | Interface -<br>EBSCOhost<br>Research<br>Databases<br>Search Screen<br>- Advanced<br>Search<br>Database -<br>CINAHL<br>Complete | 3,068   |
| S4 | (((TI celiac OR AB celiac OR SU celiac) OR<br>(TI coeliac OR AB coeliac OR SU coeliac)) N3 | Expanders - Apply<br>equivalent subjects                                     | Interface -<br>EBSCOhost                                                                                                       | 6,934   |

|    |                                                                                                                                                                                                                                                                                                                                                               |                                                                              |                                                                                                                                |       |
|----|---------------------------------------------------------------------------------------------------------------------------------------------------------------------------------------------------------------------------------------------------------------------------------------------------------------------------------------------------------------|------------------------------------------------------------------------------|--------------------------------------------------------------------------------------------------------------------------------|-------|
|    | ((TI disease OR AB disease OR SU disease)<br>OR (TI sprue OR AB sprue OR SU sprue) OR<br>(TI syndrome OR AB syndrome OR SU<br>syndrome)))                                                                                                                                                                                                                     | Search modes -<br>Boolean/Phrase                                             | Research<br>Databases<br>Search Screen<br>- Advanced<br>Search<br>Database -<br>CINAHL<br>Complete                             |       |
| S5 | ((TI gluten* OR AB gluten* OR SU gluten*)<br>N3 ((TI enteropath* OR AB enteropath* OR<br>SU enteropath*) OR (TI induced OR AB<br>induced OR SU induced) OR (TI intolerance<br>OR AB intolerance OR SU intolerance) OR (TI<br>sensitiv* OR AB sensitiv* OR SU sensitiv*)))<br>OR (TI "gluten-free diet" OR AB "gluten-free<br>diet" OR SU "gluten-free diet")) | Expanders - Apply<br>equivalent subjects<br>Search modes -<br>Boolean/Phrase | Interface -<br>EBSCOhost<br>Research<br>Databases<br>Search Screen<br>- Advanced<br>Search<br>Database -<br>CINAHL<br>Complete | 2,002 |
| S6 | S1 OR S2 OR S3 OR S4 OR S5                                                                                                                                                                                                                                                                                                                                    | Expanders - Apply<br>equivalent subjects<br>Search modes -<br>Boolean/Phrase | Interface -<br>EBSCOhost<br>Research<br>Databases<br>Search Screen<br>- Advanced<br>Search<br>Database -<br>CINAHL<br>Complete | 8,689 |
| S7 | (MH "Mild Cognitive Impairment")                                                                                                                                                                                                                                                                                                                              | Expanders - Apply<br>equivalent subjects<br>Search modes -<br>Boolean/Phrase | Interface -<br>EBSCOhost<br>Research<br>Databases<br>Search Screen<br>- Advanced                                               | 1,016 |

|     |                                  |                                                                        |                                                                                                              |        |
|-----|----------------------------------|------------------------------------------------------------------------|--------------------------------------------------------------------------------------------------------------|--------|
|     |                                  |                                                                        | Search Database - CINAHL Complete                                                                            |        |
| S8  | (MH "Cognition Disorders")       | Expanders - Apply equivalent subjects<br>Search modes - Boolean/Phrase | Interface - EBSCOhost<br>Research Databases<br>Search Screen - Advanced<br>Search Database - CINAHL Complete | 35,144 |
| S9  | (MH "Mental Fatigue")            | Expanders - Apply equivalent subjects<br>Search modes - Boolean/Phrase | Interface - EBSCOhost<br>Research Databases<br>Search Screen - Advanced<br>Search Database - CINAHL Complete | 558    |
| S10 | (MH "Fatigue Syndrome, Chronic") | Expanders - Apply equivalent subjects<br>Search modes - Boolean/Phrase | Interface - EBSCOhost<br>Research Databases<br>Search Screen - Advanced<br>Search Database - CINAHL Complete | 3,381  |

|     |                                                      |                                                                        |                                                                                                              |        |
|-----|------------------------------------------------------|------------------------------------------------------------------------|--------------------------------------------------------------------------------------------------------------|--------|
| S11 | (MH Consciousness) OR (MH “Consciousness Disorders”) | Expanders - Apply equivalent subjects<br>Search modes - Boolean/Phrase | Interface - EBSCOhost<br>Research Databases<br>Search Screen - Advanced Search<br>Database - CINAHL Complete | 4,897  |
| S12 | (MH "Cognitive Dissonance")                          | Expanders - Apply equivalent subjects<br>Search modes - Boolean/Phrase | Interface - EBSCOhost<br>Research Databases<br>Search Screen - Advanced Search<br>Database - CINAHL Complete | 497    |
| S13 | (MH Amnesia+)                                        | Expanders - Apply equivalent subjects<br>Search modes - Boolean/Phrase | Interface - EBSCOhost<br>Research Databases<br>Search Screen - Advanced Search<br>Database - CINAHL Complete | 2,231  |
| S14 | (MH Memory) OR (MH Memory Disorders)                 | Expanders - Apply equivalent subjects<br>Search modes - Boolean/Phrase | Interface - EBSCOhost<br>Research Databases                                                                  | 33,834 |

|     |                           |                                                                              |                                                                                                                                |        |
|-----|---------------------------|------------------------------------------------------------------------------|--------------------------------------------------------------------------------------------------------------------------------|--------|
|     |                           |                                                                              | Search Screen<br>- Advanced<br>Search<br>Database -<br>CINAHL<br>Complete                                                      |        |
| S15 | (MH "Executive Function") | Expanders - Apply<br>equivalent subjects<br>Search modes -<br>Boolean/Phrase | Interface -<br>EBSCOhost<br>Research<br>Databases<br>Search Screen<br>- Advanced<br>Search<br>Database -<br>CINAHL<br>Complete | 6,933  |
| S16 | (MH "Processing Speed")   | Expanders - Apply<br>equivalent subjects<br>Search modes -<br>Boolean/Phrase | Interface -<br>EBSCOhost<br>Research<br>Databases<br>Search Screen<br>- Advanced<br>Search<br>Database -<br>CINAHL<br>Complete | 128    |
| S17 | (MH "Problem Solving+")   | Expanders - Apply<br>equivalent subjects<br>Search modes -<br>Boolean/Phrase | Interface -<br>EBSCOhost<br>Research<br>Databases<br>Search Screen<br>- Advanced<br>Search<br>Database -                       | 13,778 |

|     |                                                                                                                                                                                                                                                                                                                                                                                                           |                                                                        |                                                                                                              |        |
|-----|-----------------------------------------------------------------------------------------------------------------------------------------------------------------------------------------------------------------------------------------------------------------------------------------------------------------------------------------------------------------------------------------------------------|------------------------------------------------------------------------|--------------------------------------------------------------------------------------------------------------|--------|
|     |                                                                                                                                                                                                                                                                                                                                                                                                           |                                                                        | CINAHL Complete                                                                                              |        |
| S18 | (MH "Decision Making") OR (MH Judgment)                                                                                                                                                                                                                                                                                                                                                                   | Expanders - Apply equivalent subjects<br>Search modes - Boolean/Phrase | Interface - EBSCOhost<br>Research Databases<br>Search Screen - Advanced Search<br>Database - CINAHL Complete | 65,685 |
| S19 | (MH Readability)                                                                                                                                                                                                                                                                                                                                                                                          | Expanders - Apply equivalent subjects<br>Search modes - Boolean/Phrase | Interface - EBSCOhost<br>Research Databases<br>Search Screen - Advanced Search<br>Database - CINAHL Complete | 5,247  |
| S20 | ((((TI neurocognitive OR AB neurocognitive OR SU neurocognitive) OR (TI neuro-cognitive OR AB neuro-cognitive OR SU neuro-cognitive)) N3 ((TI dysfunction OR AB dysfunction OR SU dysfunction) OR (TI disorder* OR AB disorder* OR SU disorder*) OR (TI impairment* OR AB impairment* OR SU impairment*) OR (TI symptom* OR AB symptom* OR SU symptom*) OR (TI syndrome OR AB syndrome OR SU syndrome)))) | Expanders - Apply equivalent subjects<br>Search modes - Boolean/Phrase | Interface - EBSCOhost<br>Research Databases<br>Search Screen - Advanced Search<br>Database - CINAHL Complete | 2,887  |
| S21 | ((((TI cognitive OR AB cognitive OR SU                                                                                                                                                                                                                                                                                                                                                                    | Expanders - Apply                                                      | Interface -                                                                                                  | 68,866 |



|     |                                                                                                                                                                                                                                                                                                                                                                                                                                                                                                |                                                                              |                                                                                                                                |       |
|-----|------------------------------------------------------------------------------------------------------------------------------------------------------------------------------------------------------------------------------------------------------------------------------------------------------------------------------------------------------------------------------------------------------------------------------------------------------------------------------------------------|------------------------------------------------------------------------------|--------------------------------------------------------------------------------------------------------------------------------|-------|
|     | cognitive) OR (TI cognition OR AB cognition OR SU cognition)) N3 ((TI defect* OR AB defect* OR SU defect*) OR (TI deficit* OR AB deficit* OR SU deficit*) OR (TI disabilit* OR AB disabilit* OR SU disabilit*) OR (TI dissonance* OR AB dissonance* OR SU dissonance*) OR (TI dysfunction* OR AB dysfunction* OR SU dysfunction*) OR (TI disorder* OR AB disorder* OR SU disorder*) OR (TI impairment* OR AB impairment* OR SU impairment*) OR (TI syndrome* OR AB syndrome* OR SU syndrome*)) | equivalent subjects<br>Search modes -<br>Boolean/Phrase                      | EBSCOhost<br>Research<br>Databases<br>Search Screen<br>- Advanced<br>Search<br>Database -<br>CINAHL<br>Complete                |       |
| S22 | ((TI fatigue OR AB fatigue OR SU fatigue) N3 ((TI chronic OR AB chronic OR SU chronic) OR (TI disorder* OR AB disorder* OR SU disorder*) OR (TI multidimensional OR AB multidimensional OR SU multidimensional) OR (TI severe OR AB severe OR SU severe) OR (TI syndrome* OR AB syndrome* OR SU syndrome*) OR (TI unidimensional OR AB unidimensional OR SU unidimensional)))                                                                                                                  | Expanders - Apply<br>equivalent subjects<br>Search modes -<br>Boolean/Phrase | Interface -<br>EBSCOhost<br>Research<br>Databases<br>Search Screen<br>- Advanced<br>Search<br>Database -<br>CINAHL<br>Complete | 7,094 |
| S23 | ((((TI brain OR AB brain OR SU brain) OR (TI cognitive OR AB cognitive OR SU cognitive) OR (TI mental OR AB mental OR SU mental) OR (TI mind OR AB mind OR SU mind)) N3 ((TI fatigue OR AB fatigue OR SU fatigue) OR (TI tiredness OR AB tiredness OR SU tiredness) OR (TI exhaustion OR AB exhaustion OR SU exhaustion)))                                                                                                                                                                     | Expanders - Apply<br>equivalent subjects<br>Search modes -<br>Boolean/Phrase | Interface -<br>EBSCOhost<br>Research<br>Databases<br>Search Screen<br>- Advanced<br>Search<br>Database -<br>CINAHL<br>Complete | 2,935 |
| S24 | ((((TI brain OR AB brain OR SU brain) OR (TI cognitive OR AB cognitive OR SU cognitive)                                                                                                                                                                                                                                                                                                                                                                                                        | Expanders - Apply<br>equivalent subjects                                     | Interface -<br>EBSCOhost                                                                                                       | 276   |

|     |                                                                                                                                                                                                                                                                                                   |                                                                              |                                                                                                                                |        |
|-----|---------------------------------------------------------------------------------------------------------------------------------------------------------------------------------------------------------------------------------------------------------------------------------------------------|------------------------------------------------------------------------------|--------------------------------------------------------------------------------------------------------------------------------|--------|
|     | OR (TI mental OR AB mental OR SU mental)<br>OR (TI mind OR AB mind OR SU mind)) N3<br>((TI fog OR AB fog OR SU fog) OR (TI<br>fogginess OR AB fogginess OR SU fogginess)<br>OR (TI foggy OR AB foggy OR SU foggy) OR<br>(TI fuzzy OR AB fuzzy OR SU fuzzy)))                                      | Search modes -<br>Boolean/Phrase                                             | Research<br>Databases<br>Search Screen<br>- Advanced<br>Search<br>Database -<br>CINAHL<br>Complete                             |        |
| S25 | ((TI clouded OR AB clouded OR SU clouded)<br>OR (TI cloudy OR AB cloudy OR SU cloudy)<br>OR (TI clouding OR AB clouding OR SU<br>clouding)) N3 ((TI consciousness OR AB<br>consciousness OR SU consciousness) OR (TI<br>mind OR AB mind OR SU mind) OR (TI<br>mental OR AB mental OR SU mental))) | Expanders - Apply<br>equivalent subjects<br>Search modes -<br>Boolean/Phrase | Interface -<br>EBSCOhost<br>Research<br>Databases<br>Search Screen<br>- Advanced<br>Search<br>Database -<br>CINAHL<br>Complete | 40     |
| S26 | (TI consciousness* OR AB consciousness* OR<br>SU consciousness*)                                                                                                                                                                                                                                  | Expanders - Apply<br>equivalent subjects<br>Search modes -<br>Boolean/Phrase | Interface -<br>EBSCOhost<br>Research<br>Databases<br>Search Screen<br>- Advanced<br>Search<br>Database -<br>CINAHL<br>Complete | 14,122 |
| S27 | ((((TI effect OR AB effect OR SU effect) OR<br>(TI effects OR AB effects OR SU effects) OR<br>(TI factor* OR AB factor* OR SU factor*)) OR<br>(TI process* OR AB process* OR SU<br>process*)) AND ((TI amnesia* OR AB<br>amnesia* OR SU amnesia*) OR (TI amnesic                                  | Expanders - Apply<br>equivalent subjects<br>Search modes -<br>Boolean/Phrase | Interface -<br>EBSCOhost<br>Research<br>Databases<br>Search Screen<br>- Advanced                                               | 55,532 |

|     |                                                                                                                                                                                                                                                                                                                                                                                                                                                                                                                                                                                             |                                                                        |                                                                                                     |        |
|-----|---------------------------------------------------------------------------------------------------------------------------------------------------------------------------------------------------------------------------------------------------------------------------------------------------------------------------------------------------------------------------------------------------------------------------------------------------------------------------------------------------------------------------------------------------------------------------------------------|------------------------------------------------------------------------|-----------------------------------------------------------------------------------------------------|--------|
|     | OR AB amnesic OR SU amnesic) OR (TI forgetting OR AB forgetting OR SU forgetting) OR (TI memory OR AB memory OR SU memory) OR (TI memorizing OR AB memorizing OR SU memorizing) OR (TI remembering OR AB remembering OR SU remembering) OR (TI reminiscence OR AB reminiscence OR SU reminiscence) OR (TI "mental recall" OR AB "mental recall" OR SU "mental recall")) OR ((TI "memory deficit" OR AB "memory deficit" OR SU "memory deficit") OR (TI "memory loss" OR AB "memory loss" OR SU "memory loss") OR (TI "memory disorder*" OR AB "memory disorder*" OR SU "memory disorder*")) |                                                                        | Search Database - CINAHL Complete                                                                   |        |
| S28 | ((TI "cognitive control" OR AB "cognitive control" OR SU "cognitive control") OR (TI "executive control" OR AB "executive control" OR SU "executive control") OR (TI "executive function" OR AB "executive function" OR SU "executive function"))                                                                                                                                                                                                                                                                                                                                           | Expanders - Apply equivalent subjects<br>Search modes - Boolean/Phrase | Interface - EBSCOhost Research Databases Search Screen - Advanced Search Database - CINAHL Complete | 13,526 |
| S29 | ((TI processing OR AB processing OR SU processing) N3 ((TI rate OR AB rate OR SU rate) OR (TI velocity OR AB velocity OR SU velocity) OR (TI speed OR AB speed OR SU speed)))                                                                                                                                                                                                                                                                                                                                                                                                               | Expanders - Apply equivalent subjects<br>Search modes - Boolean/Phrase | Interface - EBSCOhost Research Databases Search Screen - Advanced Search Database - CINAHL Complete | 4,597  |

|     |                                                                                                                                                                                                                                                                                                                                                                                                                                                                                                                                                                                                                                                                 |                                                                              |                                                                                                                                |         |
|-----|-----------------------------------------------------------------------------------------------------------------------------------------------------------------------------------------------------------------------------------------------------------------------------------------------------------------------------------------------------------------------------------------------------------------------------------------------------------------------------------------------------------------------------------------------------------------------------------------------------------------------------------------------------------------|------------------------------------------------------------------------------|--------------------------------------------------------------------------------------------------------------------------------|---------|
| S30 | (((TI effect OR AB effect OR SU effect) OR (TI effects OR AB effects OR SU effects) OR (TI factor* OR AB factor* OR SU factor*) OR (TI process* OR AB process* OR SU process*)) AND ((TI "problem solving" OR AB "problem solving" OR SU "problem solving") OR (TI decision OR AB decision OR SU decision) OR (TI judgment* OR AB judgment* OR SU judgment*) OR (TI judgement* OR AB judgement* OR SU judgement*) OR (TI "choice making" OR AB "choice making" OR SU "choice making") OR (TI decisionmaking OR AB decisionmaking OR SU decisionmaking) OR (TI judgement* OR AB judgement* OR SU judgement*) OR (TI judgment* OR AB judgment* OR SU judgment*))) | Expanders - Apply<br>equivalent subjects<br>Search modes -<br>Boolean/Phrase | Interface -<br>EBSCOhost<br>Research<br>Databases<br>Search Screen<br>- Advanced<br>Search<br>Database -<br>CINAHL<br>Complete | 156,021 |
| S31 | (((TI mental OR AB mental OR SU mental) OR (TI cognitive OR AB cognitive OR SU cognitive) OR (TI intellectual OR AB intellectual OR SU intellectual) OR (TI passive OR AB passive OR SU passive) OR (TI psychological OR AB psychological OR SU psychological) OR (TI perceptual OR AB perceptual OR SU perceptual) OR (TI cerebral OR AB cerebral OR SU cerebral) OR (TI brain OR AB brain OR SU brain)) N3 ((TI comprehension OR AB comprehension OR SU comprehension) OR (TI understanding OR AB understanding OR SU understanding) OR (TI readability OR AB readability OR SU readability)))                                                                | Expanders - Apply<br>equivalent subjects<br>Search modes -<br>Boolean/Phrase | Interface -<br>EBSCOhost<br>Research<br>Databases<br>Search Screen<br>- Advanced<br>Search<br>Database -<br>CINAHL<br>Complete | 5,549   |
| S32 | (MH "Insomnia")                                                                                                                                                                                                                                                                                                                                                                                                                                                                                                                                                                                                                                                 | Expanders - Apply<br>equivalent subjects<br>Search modes -                   | Interface -<br>EBSCOhost<br>Research                                                                                           | 9,173   |

|     |                                                                                                                                       |                                                                              |                                                                                                                                |        |
|-----|---------------------------------------------------------------------------------------------------------------------------------------|------------------------------------------------------------------------------|--------------------------------------------------------------------------------------------------------------------------------|--------|
|     |                                                                                                                                       | Boolean/Phrase                                                               | Databases<br>Search Screen<br>- Advanced<br>Search<br>Database -<br>CINAHL<br>Complete                                         |        |
| S33 | (MH "Sleep Disorders+")                                                                                                               | Expanders - Apply<br>equivalent subjects<br>Search modes -<br>Boolean/Phrase | Interface -<br>EBSCOhost<br>Research<br>Databases<br>Search Screen<br>- Advanced<br>Search<br>Database -<br>CINAHL<br>Complete | 46,094 |
| S34 | (MH "Sleep Quality")                                                                                                                  | Expanders - Apply<br>equivalent subjects<br>Search modes -<br>Boolean/Phrase | Interface -<br>EBSCOhost<br>Research<br>Databases<br>Search Screen<br>- Advanced<br>Search<br>Database -<br>CINAHL<br>Complete | 1,766  |
| S35 | (MH Dyssomnias) OR (MH "Sleep<br>Deprivation") OR (MH "Sleep Disorders,<br>Circadian Rhythm") OR (MH "Sleep<br>Disorders, Intrinsic") | Expanders - Apply<br>equivalent subjects<br>Search modes -<br>Boolean/Phrase | Interface -<br>EBSCOhost<br>Research<br>Databases<br>Search Screen<br>- Advanced<br>Search                                     | 5,309  |

|     |                                                                                    |                                                                              |                                                                                                                                |        |
|-----|------------------------------------------------------------------------------------|------------------------------------------------------------------------------|--------------------------------------------------------------------------------------------------------------------------------|--------|
|     |                                                                                    |                                                                              | Database -<br>CINAHL<br>Complete                                                                                               |        |
| S36 | (MH Parasomnias) OR (MH "Sleep, REM")<br>OR (MH "Sleep-Wake Transition Disorders") | Expanders - Apply<br>equivalent subjects<br>Search modes -<br>Boolean/Phrase | Interface -<br>EBSCOhost<br>Research<br>Databases<br>Search Screen<br>- Advanced<br>Search<br>Database -<br>CINAHL<br>Complete | 2,683  |
| S37 | (MH "Disorders of Excessive Somnolence")                                           | Expanders - Apply<br>equivalent subjects<br>Search modes -<br>Boolean/Phrase | Interface -<br>EBSCOhost<br>Research<br>Databases<br>Search Screen<br>- Advanced<br>Search<br>Database -<br>CINAHL<br>Complete | 1,297  |
| S38 | (MH "Myoclonus")                                                                   | Expanders - Apply<br>equivalent subjects<br>Search modes -<br>Boolean/Phrase | Interface -<br>EBSCOhost<br>Research<br>Databases<br>Search Screen<br>- Advanced<br>Search<br>Database -<br>CINAHL<br>Complete | 945    |
| S39 | (MH "Sleep Apnea Syndromes+")                                                      | Expanders - Apply                                                            | Interface -                                                                                                                    | 16,512 |

|     |                                                                                                                                                                                                                                                                                                                                                                                                                                                                                                                                                                                                                                                                                                                                                                                                                                                                                                                                                                                                                         |                                                                              |                                                                                                                                |        |
|-----|-------------------------------------------------------------------------------------------------------------------------------------------------------------------------------------------------------------------------------------------------------------------------------------------------------------------------------------------------------------------------------------------------------------------------------------------------------------------------------------------------------------------------------------------------------------------------------------------------------------------------------------------------------------------------------------------------------------------------------------------------------------------------------------------------------------------------------------------------------------------------------------------------------------------------------------------------------------------------------------------------------------------------|------------------------------------------------------------------------------|--------------------------------------------------------------------------------------------------------------------------------|--------|
|     |                                                                                                                                                                                                                                                                                                                                                                                                                                                                                                                                                                                                                                                                                                                                                                                                                                                                                                                                                                                                                         | equivalent subjects<br>Search modes -<br>Boolean/Phrase                      | EBSCOhost<br>Research<br>Databases<br>Search Screen<br>- Advanced<br>Search<br>Database -<br>CINAHL<br>Complete                |        |
| S40 | ((TI sleep* OR AB sleep* OR SU sleep*) N3<br>((TI behav* OR AB behav* OR SU behav*)<br>OR (TI deficit OR AB deficit OR SU deficit)<br>OR (TI deprivation OR AB deprivation OR SU<br>deprivation) OR (TI difficul* OR AB difficul*<br>OR SU difficul*) OR (TI disorder* OR AB<br>disorder* OR SU disorder*) OR (TI disrupt*<br>OR AB disrupt* OR SU disrupt*) OR (TI<br>disturb* OR AB disturb* OR SU disturb*) OR<br>(TI duration OR AB duration OR SU duration)<br>OR (TI impairment OR AB impairment OR SU<br>impairment) OR (TI inability OR AB inability<br>OR SU inability) OR (TI initiation OR AB<br>initiation OR SU initiation) OR (TI issue* OR<br>AB issue* OR SU issue*) OR (TI problem*<br>OR AB problem* OR SU problem*) OR (TI<br>maintenance OR AB maintenance OR SU<br>maintenance) OR (TI practice* OR AB<br>practice* OR SU practice*) OR (TI quality OR<br>AB quality OR SU quality) OR (TI recovery<br>OR AB recovery OR SU recovery) OR (TI<br>resistance OR AB resistance OR SU<br>resistance))) | Expanders - Apply<br>equivalent subjects<br>Search modes -<br>Boolean/Phrase | Interface -<br>EBSCOhost<br>Research<br>Databases<br>Search Screen<br>- Advanced<br>Search<br>Database -<br>CINAHL<br>Complete | 49,759 |
| S41 | ((TI dyssomnia* OR AB dyssomnia* OR SU<br>dyssomnia*) OR (TI insomnia* OR AB<br>insomnia* OR SU insomnia*) OR (TI                                                                                                                                                                                                                                                                                                                                                                                                                                                                                                                                                                                                                                                                                                                                                                                                                                                                                                       | Expanders - Apply<br>equivalent subjects<br>Search modes -                   | Interface -<br>EBSCOhost<br>Research                                                                                           | 16,270 |

|     |                                                                                                                                                                                                                                                                                                                                                                                                                                                                                                                                                                                                                                                                                                                                                                                 |                                                                              |                                                                                                                                |        |
|-----|---------------------------------------------------------------------------------------------------------------------------------------------------------------------------------------------------------------------------------------------------------------------------------------------------------------------------------------------------------------------------------------------------------------------------------------------------------------------------------------------------------------------------------------------------------------------------------------------------------------------------------------------------------------------------------------------------------------------------------------------------------------------------------|------------------------------------------------------------------------------|--------------------------------------------------------------------------------------------------------------------------------|--------|
|     | parasomnia* OR AB parasomnia* OR SU parasomnia*))                                                                                                                                                                                                                                                                                                                                                                                                                                                                                                                                                                                                                                                                                                                               | Boolean/Phrase                                                               | Databases<br>Search Screen<br>- Advanced<br>Search<br>Database -<br>CINAHL<br>Complete                                         |        |
| S42 | ((TI "rapid eye movement behav*" OR AB "rapid eye movement behav*" OR SU "rapid eye movement behav*") OR (TI RBD OR AB RBD OR SU RBD) OR (TI "REM behavior disorder*" OR AB "REM behavior disorder*" OR SU "REM behavior disorder*") OR (TI "REM behav*" OR AB "REM behav*" OR SU "REM behav*") OR (TI "REM sleep behav*" OR AB "REM sleep behav*" OR SU "REM sleep behav*"))                                                                                                                                                                                                                                                                                                                                                                                                   | Expanders - Apply<br>equivalent subjects<br>Search modes -<br>Boolean/Phrase | Interface -<br>EBSCOhost<br>Research<br>Databases<br>Search Screen<br>- Advanced<br>Search<br>Database -<br>CINAHL<br>Complete | 1,338  |
| S43 | ((TI "circadian rhythm*" OR AB "circadian rhythm*" OR SU "circadian rhythm*") OR (TI "circadian variation" OR AB "circadian variation" OR SU "circadian variation") OR (TI "diurnal cycle" OR AB "diurnal cycle" OR SU "diurnal cycle") OR (TI "diurnal fluctuation" OR AB "diurnal fluctuation" OR SU "diurnal fluctuation") OR (TI "diurnal pattern" OR AB "diurnal pattern" OR SU "diurnal pattern") OR (TI "diurnal rhythm*" OR AB "diurnal rhythm*" OR SU "diurnal rhythm*") OR (TI "diurnal variation" OR AB "diurnal variation" OR SU "diurnal variation") OR (TI nyctohemeral OR AB nyctohemeral OR SU nyctohemeral) OR (TI nycthemeral OR AB nycthemeral OR SU nycthemeral) OR (TI "twenty-four hour rhythm*" OR AB "twenty-four hour rhythm*" OR SU "twenty-four hour | Expanders - Apply<br>equivalent subjects<br>Search modes -<br>Boolean/Phrase | Interface -<br>EBSCOhost<br>Research<br>Databases<br>Search Screen<br>- Advanced<br>Search<br>Database -<br>CINAHL<br>Complete | 10,289 |



|     |                                                                                                                                                                                                                                                                                                                                                                                                                                                                                                                                                                                                                                                       |                                                                        |                                                                                                              |        |
|-----|-------------------------------------------------------------------------------------------------------------------------------------------------------------------------------------------------------------------------------------------------------------------------------------------------------------------------------------------------------------------------------------------------------------------------------------------------------------------------------------------------------------------------------------------------------------------------------------------------------------------------------------------------------|------------------------------------------------------------------------|--------------------------------------------------------------------------------------------------------------|--------|
|     | rhythm*"))                                                                                                                                                                                                                                                                                                                                                                                                                                                                                                                                                                                                                                            |                                                                        |                                                                                                              |        |
| S44 | ((TI "myoclonus during sleep" OR AB "myoclonus during sleep" OR SU "myoclonus during sleep") OR (TI "nocturnal myoclonus" OR AB "nocturnal myoclonus" OR SU "nocturnal myoclonus") OR (TI "nocturnal myoclonus syndrome" OR AB "nocturnal myoclonus syndrome" OR SU "nocturnal myoclonus syndrome") OR (TI "periodic leg movement*" OR AB "periodic leg movement*" OR SU "periodic leg movement*") OR (TI "periodic limb movement*" OR AB "periodic limb movement*" OR SU "periodic limb movement*") OR (TI PLMD OR AB PLMD OR SU PLMD) OR (TI PLMS OR AB PLMS OR SU PLMS) OR (TI "sleep myoclonus" OR AB "sleep myoclonus" OR SU "sleep myoclonus")) | Expanders - Apply equivalent subjects<br>Search modes - Boolean/Phrase | Interface - EBSCOhost<br>Research Databases<br>Search Screen - Advanced Search<br>Database - CINAHL Complete | 775    |
| S45 | ((TI "obstructive apnea*" OR AB "obstructive apnea*" OR SU "obstructive apnea*") OR (TI "obstructive apnoe*" OR AB "obstructive apnoe*" OR SU "obstructive apnoe*") OR (TI "sleep apnea" OR AB "sleep apnea" OR SU "sleep apnea") OR (TI "sleep apno*" OR AB "sleep apno*" OR SU "sleep apno*") OR (TI "sleep hypopnea*" OR AB "sleep hypopnea*" OR SU "sleep hypopnea*") OR (TI "sleep-disordered breathing" OR AB "sleep-disordered breathing" OR SU "sleep-disordered breathing") OR (TI "OSAHS" OR AB "OSAHS" OR SU "OSAHS"))                                                                                                                     | Expanders - Apply equivalent subjects<br>Search modes - Boolean/Phrase | Interface - EBSCOhost<br>Research Databases<br>Search Screen - Advanced Search<br>Database - CINAHL Complete | 21,515 |
| S46 | ((TI Waking-up OR AB Waking-up OR SU Waking-up) OR (((TI early OR AB early OR SU early) OR (TI sleep* OR AB sleep* OR SU                                                                                                                                                                                                                                                                                                                                                                                                                                                                                                                              | Expanders - Apply equivalent subjects<br>Search modes -                | Interface - EBSCOhost<br>Research                                                                            | 7,006  |

|     |                                                                                                                                                                                                                                                                                                                                  |                                                                              |                                                                                                                                |         |
|-----|----------------------------------------------------------------------------------------------------------------------------------------------------------------------------------------------------------------------------------------------------------------------------------------------------------------------------------|------------------------------------------------------------------------------|--------------------------------------------------------------------------------------------------------------------------------|---------|
|     | sleep*) OR (TI night* OR AB night* OR SU night*) OR (TI nocturnal OR AB nocturnal OR SU nocturnal) OR (TI prolonged OR AB prolonged OR SU prolonged)) N3 ((TI awake* OR AB awake* OR SU awake*) OR (TI wake* OR AB wake* OR SU wake*) OR (TI waking* OR AB waking* OR SU waking*) OR (TI awaking OR AB awaking OR SU awaking)))) | Boolean/Phrase                                                               | Databases<br>Search Screen<br>- Advanced<br>Search<br>Database -<br>CINAHL<br>Complete                                         |         |
| S47 | ((TI "poor sleep" OR AB "poor sleep" OR SU "poor sleep") OR (TI "sleep qualit*" OR AB "sleep qualit*" OR SU "sleep qualit*"))                                                                                                                                                                                                    | Expanders - Apply<br>equivalent subjects<br>Search modes -<br>Boolean/Phrase | Interface -<br>EBSCOhost<br>Research<br>Databases<br>Search Screen<br>- Advanced<br>Search<br>Database -<br>CINAHL<br>Complete | 12,486  |
| S48 | ((TI hypersomnolence OR AB hypersomnolence OR SU hypersomnolence) OR (TI somnolence OR AB somnolence OR SU somnolence) OR (TI sleepiness OR AB sleepiness OR SU sleepiness))                                                                                                                                                     | Expanders - Apply<br>equivalent subjects<br>Search modes -<br>Boolean/Phrase | Interface -<br>EBSCOhost<br>Research<br>Databases<br>Search Screen<br>- Advanced<br>Search<br>Database -<br>CINAHL<br>Complete | 7,700   |
| S49 | S7 OR S8 OR S9 OR S10 OR S11 OR S12 OR S13 OR S14 OR S15 OR S16 OR S17 OR S18 OR S19 OR S20 OR S21 OR S22 OR S23 OR S24 OR S25 OR S26 OR S27 OR S28 OR S29 OR S30 OR S31 OR S32 OR S33 OR S34 OR S35 OR S36 OR S37 OR S38 OR S39 OR S40                                                                                          | Expanders - Apply<br>equivalent subjects<br>Search modes -<br>Boolean/Phrase | Interface -<br>EBSCOhost<br>Research<br>Databases<br>Search Screen<br>- Advanced                                               | 425,990 |

|     |                                                         |                                                                        |                                                                                                              |     |
|-----|---------------------------------------------------------|------------------------------------------------------------------------|--------------------------------------------------------------------------------------------------------------|-----|
|     | OR S41 OR S42 OR S43 OR S44 OR S45 OR S46 OR S47 OR S48 |                                                                        | Search Database - CINAHL Complete                                                                            |     |
| S50 | S6 AND S49                                              | Expanders - Apply equivalent subjects<br>Search modes - Boolean/Phrase | Interface - EBSCOhost<br>Research Databases<br>Search Screen - Advanced<br>Search Database - CINAHL Complete | 175 |

**PsycINFO 1887-current (EBSCO)** (Run on November 13, 2023, 58 results)

| #  | Query                                                                                                                                                                                                                                                                                                                                                          | Limiters/Expanders                                                           | Last Run Via                                                                                                       | Results |
|----|----------------------------------------------------------------------------------------------------------------------------------------------------------------------------------------------------------------------------------------------------------------------------------------------------------------------------------------------------------------|------------------------------------------------------------------------------|--------------------------------------------------------------------------------------------------------------------|---------|
| S1 | (DE "celiac disease")                                                                                                                                                                                                                                                                                                                                          | Expanders - Apply<br>equivalent subjects<br>Search modes -<br>Boolean/Phrase | Interface -<br>EBSCOhost<br>Research<br>Databases<br>Search Screen<br>- Basic Search<br>Database -<br>APA PsycInfo | 399     |
| S2 | (((TI celiac OR AB celiac OR SU celiac) OR<br>(TI coeliac OR AB coeliac OR SU coeliac)) N3<br>((TI disease OR AB disease OR SU disease)<br>OR (TI sprue OR AB sprue OR SU sprue) OR<br>(TI syndrome OR AB syndrome OR SU<br>syndrome)))                                                                                                                        | Expanders - Apply<br>equivalent subjects<br>Search modes -<br>Boolean/Phrase | Interface -<br>EBSCOhost<br>Research<br>Databases<br>Search Screen<br>- Basic Search<br>Database -<br>APA PsycInfo | 537     |
| S3 | (((TI gluten* OR AB gluten* OR SU gluten*)<br>N3 ((TI enteropath* OR AB enteropath* OR<br>SU enteropath*) OR (TI induced OR AB<br>induced OR SU induced) OR (TI intolerance<br>OR AB intolerance OR SU intolerance) OR (TI<br>sensitiv* OR AB sensitiv* OR SU sensitiv*)))<br>OR (TI "gluten-free diet" OR AB "gluten-free<br>diet" OR SU "gluten-free diet")) | Expanders - Apply<br>equivalent subjects<br>Search modes -<br>Boolean/Phrase | Interface -<br>EBSCOhost<br>Research<br>Databases<br>Search Screen<br>- Basic Search<br>Database -<br>APA PsycInfo | 261     |
| S4 | S1 OR S2 OR S3                                                                                                                                                                                                                                                                                                                                                 | Expanders - Apply<br>equivalent subjects<br>Search modes -<br>Boolean/Phrase | Interface -<br>EBSCOhost<br>Research<br>Databases<br>Search Screen<br>- Basic Search<br>Database -<br>APA PsycInfo | 599     |

|    |                                  |                                                                              |                                                                                                                    |        |
|----|----------------------------------|------------------------------------------------------------------------------|--------------------------------------------------------------------------------------------------------------------|--------|
| S5 | (DE "Neurocognitive Disorders")  | Expanders - Apply<br>equivalent subjects<br>Search modes -<br>Boolean/Phrase | Interface -<br>EBSCOhost<br>Research<br>Databases<br>Search Screen<br>- Basic Search<br>Database -<br>APA PsycInfo | 5,490  |
| S6 | (DE "Mild Cognitive Impairment") | Expanders - Apply<br>equivalent subjects<br>Search modes -<br>Boolean/Phrase | Interface -<br>EBSCOhost<br>Research<br>Databases<br>Search Screen<br>- Basic Search<br>Database -<br>APA PsycInfo | 10,519 |
| S7 | ( DE "Cognitive Impairment")     | Expanders - Apply<br>equivalent subjects<br>Search modes -<br>Boolean/Phrase | Interface -<br>EBSCOhost<br>Research<br>Databases<br>Search Screen<br>- Basic Search<br>Database -<br>APA PsycInfo | 45,020 |
| S8 | (DE "Fatigue")                   | Expanders - Apply<br>equivalent subjects<br>Search modes -<br>Boolean/Phrase | Interface -<br>EBSCOhost<br>Research<br>Databases<br>Search Screen<br>- Basic Search<br>Database -<br>APA PsycInfo | 14,326 |
| S9 | (DE "Chronic Fatigue Syndrome")  | Expanders - Apply<br>equivalent subjects                                     | Interface -<br>EBSCOhost                                                                                           | 2,152  |

|     |                                                                                                                                                         |                                                                              |                                                                                                                    |         |
|-----|---------------------------------------------------------------------------------------------------------------------------------------------------------|------------------------------------------------------------------------------|--------------------------------------------------------------------------------------------------------------------|---------|
|     |                                                                                                                                                         | Search modes -<br>Boolean/Phrase                                             | Research<br>Databases<br>Search Screen<br>- Basic Search<br>Database -<br>APA PsycInfo                             |         |
| S10 | (DE "Consciousness Disorders") OR (DE "Consciousness States") OR (DE "Consciousness Disturbances")                                                      | Expanders - Apply<br>equivalent subjects<br>Search modes -<br>Boolean/Phrase | Interface -<br>EBSCOhost<br>Research<br>Databases<br>Search Screen<br>- Basic Search<br>Database -<br>APA PsycInfo | 17,872  |
| S11 | (DE "Cognitive Dissonance")                                                                                                                             | Expanders - Apply<br>equivalent subjects<br>Search modes -<br>Boolean/Phrase | Interface -<br>EBSCOhost<br>Research<br>Databases<br>Search Screen<br>- Basic Search<br>Database -<br>APA PsycInfo | 2,905   |
| S12 | DE Amnesia OR DE "Anterograde Amnesia"<br>OR DE "Global Amnesia" OR OR DE<br>"Retrograde Amnesia" OR DE "Dissociation"<br>OR DE "Dissociative Amnesia"  | Expanders - Apply<br>equivalent subjects<br>Search modes -<br>Boolean/Phrase | Interface -<br>EBSCOhost<br>Research<br>Databases<br>Search Screen<br>- Basic Search<br>Database -<br>APA PsycInfo | 12,793  |
| S13 | DE Memory OR DE "Memory Disorders" or<br>DE "Thought Disorders" OR DE "Forgetting"<br>OR DE "Memory Decay" OR DE "Memory<br>Trace" OR DE "Reminiscence" | Expanders - Apply<br>equivalent subjects<br>Search modes -<br>Boolean/Phrase | Interface -<br>EBSCOhost<br>Research<br>Databases                                                                  | 113,231 |

|     |                                         |                                                                              |                                                                                                                    |         |
|-----|-----------------------------------------|------------------------------------------------------------------------------|--------------------------------------------------------------------------------------------------------------------|---------|
|     |                                         |                                                                              | Search Screen<br>- Basic Search<br>Database -<br>APA PsycInfo                                                      |         |
| S14 | (DE "Executive Function")               | Expanders - Apply<br>equivalent subjects<br>Search modes -<br>Boolean/Phrase | Interface -<br>EBSCOhost<br>Research<br>Databases<br>Search Screen<br>- Basic Search<br>Database -<br>APA PsycInfo | 20,795  |
| S15 | (DE "Cognitive Processing Speed")       | Expanders - Apply<br>equivalent subjects<br>Search modes -<br>Boolean/Phrase | Interface -<br>EBSCOhost<br>Research<br>Databases<br>Search Screen<br>- Basic Search<br>Database -<br>APA PsycInfo | 3,338   |
| S16 | (DE "Problem Solving")                  | Expanders - Apply<br>equivalent subjects<br>Search modes -<br>Boolean/Phrase | Interface -<br>EBSCOhost<br>Research<br>Databases<br>Search Screen<br>- Basic Search<br>Database -<br>APA PsycInfo | 41,736  |
| S17 | (DE "Decision Making") OR (DE Judgment) | Expanders - Apply<br>equivalent subjects<br>Search modes -<br>Boolean/Phrase | Interface -<br>EBSCOhost<br>Research<br>Databases<br>Search Screen<br>- Basic Search                               | 132,033 |

|     |                                                                                                                                                                                                                                                                                                                                                                                                                                                                                                                                         |                                                                              |                                                                                                                    |         |
|-----|-----------------------------------------------------------------------------------------------------------------------------------------------------------------------------------------------------------------------------------------------------------------------------------------------------------------------------------------------------------------------------------------------------------------------------------------------------------------------------------------------------------------------------------------|------------------------------------------------------------------------------|--------------------------------------------------------------------------------------------------------------------|---------|
|     |                                                                                                                                                                                                                                                                                                                                                                                                                                                                                                                                         |                                                                              | Database -<br>APA PsycInfo                                                                                         |         |
| S18 | (DE Readability)                                                                                                                                                                                                                                                                                                                                                                                                                                                                                                                        | Expanders - Apply<br>equivalent subjects<br>Search modes -<br>Boolean/Phrase | Interface -<br>EBSCOhost<br>Research<br>Databases<br>Search Screen<br>- Basic Search<br>Database -<br>APA PsycInfo | 974     |
| S19 | ((((TI neurocognitive OR AB neurocognitive OR SU neurocognitive) OR (TI neuro-cognitive OR AB neuro-cognitive OR SU neuro-cognitive)) N3 ((TI dysfunction OR AB dysfunction OR SU dysfunction) OR (TI disorder* OR AB disorder* OR SU disorder*) OR (TI impairment* OR AB impairment* OR SU impairment*) OR (TI symptom* OR AB symptom* OR SU symptom*) OR (TI syndrome OR AB syndrome OR SU syndrome))))                                                                                                                               | Expanders - Apply<br>equivalent subjects<br>Search modes -<br>Boolean/Phrase | Interface -<br>EBSCOhost<br>Research<br>Databases<br>Search Screen<br>- Basic Search<br>Database -<br>APA PsycInfo | 9,696   |
| S20 | ((((TI cognitive OR AB cognitive OR SU cognitive) OR (TI cognition OR AB cognition OR SU cognition)) N3 ((TI defect* OR AB defect* OR SU defect*) OR (TI deficit* OR AB deficit* OR SU deficit*) OR (TI disabilit* OR AB disabilit* OR SU disabilit*) OR (TI dissonance* OR AB dissonance* OR SU dissonance*) OR (TI dysfunction* OR AB dysfunction* OR SU dysfunction*) OR (TI disorder* OR AB disorder* OR SU disorder*) OR (TI impairment* OR AB impairment* OR SU impairment*) OR (TI syndrome* OR AB syndrome* OR SU syndrome*)))) | Expanders - Apply<br>equivalent subjects<br>Search modes -<br>Boolean/Phrase | Interface -<br>EBSCOhost<br>Research<br>Databases<br>Search Screen<br>- Basic Search<br>Database -<br>APA PsycInfo | 121,888 |



|     |                                                                                                                                                                                                                                                                                                                                                                               |                                                                        |                                                                                                     |        |
|-----|-------------------------------------------------------------------------------------------------------------------------------------------------------------------------------------------------------------------------------------------------------------------------------------------------------------------------------------------------------------------------------|------------------------------------------------------------------------|-----------------------------------------------------------------------------------------------------|--------|
| S21 | ((TI fatigue OR AB fatigue OR SU fatigue) N3 ((TI chronic OR AB chronic OR SU chronic) OR (TI disorder* OR AB disorder* OR SU disorder*) OR (TI multidimensional OR AB multidimensional OR SU multidimensional) OR (TI severe OR AB severe OR SU severe) OR (TI syndrome* OR AB syndrome* OR SU syndrome*) OR (TI unidimensional OR AB unidimensional OR SU unidimensional))) | Expanders - Apply equivalent subjects<br>Search modes - Boolean/Phrase | Interface - EBSCOhost<br>Research Databases<br>Search Screen - Basic Search Database - APA PsycInfo | 4,864  |
| S22 | ((((TI brain OR AB brain OR SU brain) OR (TI cognitive OR AB cognitive OR SU cognitive) OR (TI mental OR AB mental OR SU mental) OR (TI mind OR AB mind OR SU mind)) N3 ((TI fatigue OR AB fatigue OR SU fatigue) OR (TI tiredness OR AB tiredness OR SU tiredness) OR (TI exhaustion OR AB exhaustion OR SU exhaustion)))                                                    | Expanders - Apply equivalent subjects<br>Search modes - Boolean/Phrase | Interface - EBSCOhost<br>Research Databases<br>Search Screen - Basic Search Database - APA PsycInfo | 3,716  |
| S23 | ((((TI brain OR AB brain OR SU brain) OR (TI cognitive OR AB cognitive OR SU cognitive) OR (TI mental OR AB mental OR SU mental) OR (TI mind OR AB mind OR SU mind)) N3 ((TI fog OR AB fog OR SU fog) OR (TI fogginess OR AB fogginess OR SU fogginess) OR (TI foggy OR AB foggy OR SU foggy) OR (TI fuzzy OR AB fuzzy OR SU fuzzy)))                                         | Expanders - Apply equivalent subjects<br>Search modes - Boolean/Phrase | Interface - EBSCOhost<br>Research Databases<br>Search Screen - Basic Search Database - APA PsycInfo | 330    |
| S24 | ((((TI clouded OR AB clouded OR SU clouded) OR (TI cloudy OR AB cloudy OR SU cloudy) OR (TI clouding OR AB clouding OR SU clouding)) N3 ((TI consciousness OR AB consciousness OR SU consciousness) OR (TI mind OR AB mind OR SU mind) OR (TI mental OR AB mental OR SU mental)))                                                                                             | Expanders - Apply equivalent subjects<br>Search modes - Boolean/Phrase | Interface - EBSCOhost<br>Research Databases<br>Search Screen - Basic Search Database - APA PsycInfo | 182    |
| S25 | (TI consciousness* OR AB consciousness* OR                                                                                                                                                                                                                                                                                                                                    | Expanders - Apply                                                      | Interface -                                                                                         | 52,412 |

|     |                                                                                                                                                                                                                                                                                                                                                                                                                                                                                                                                                                                                                                                                                                                                                                                                                                                   |                                                                              |                                                                                                                    |         |
|-----|---------------------------------------------------------------------------------------------------------------------------------------------------------------------------------------------------------------------------------------------------------------------------------------------------------------------------------------------------------------------------------------------------------------------------------------------------------------------------------------------------------------------------------------------------------------------------------------------------------------------------------------------------------------------------------------------------------------------------------------------------------------------------------------------------------------------------------------------------|------------------------------------------------------------------------------|--------------------------------------------------------------------------------------------------------------------|---------|
|     | SU consciousness*)                                                                                                                                                                                                                                                                                                                                                                                                                                                                                                                                                                                                                                                                                                                                                                                                                                | equivalent subjects<br>Search modes -<br>Boolean/Phrase                      | EBSCOhost<br>Research<br>Databases<br>Search Screen<br>- Basic Search<br>Database -<br>APA PsycInfo                |         |
| S26 | (((((TI effect OR AB effect OR SU effect) OR (TI effects OR AB effects OR SU effects) OR (TI factor* OR AB factor* OR SU factor*)) OR (TI process* OR AB process* OR SU process*)) AND ((TI amnesia* OR AB amnesia* OR SU amnesia*) OR (TI amnesic OR AB amnesic OR SU amnesic) OR (TI forgetting OR AB forgetting OR SU forgetting) OR (TI memory OR AB memory OR SU memory) OR (TI memorizing OR AB memorizing OR SU memorizing) OR (TI remembering OR AB remembering OR SU remembering) OR (TI reminiscence OR AB reminiscence OR SU reminiscence) OR (TI "mental recall" OR AB "mental recall" OR SU "mental recall"))) OR ((TI "memory deficit" OR AB "memory deficit" OR SU "memory deficit") OR (TI "memory loss" OR AB "memory loss" OR SU "memory loss") OR (TI "memory disorder*" OR AB "memory disorder*" OR SU "memory disorder*")))) | Expanders - Apply<br>equivalent subjects<br>Search modes -<br>Boolean/Phrase | Interface -<br>EBSCOhost<br>Research<br>Databases<br>Search Screen<br>- Basic Search<br>Database -<br>APA PsycInfo | 197,850 |
| S27 | ((TI "cognitive control" OR AB "cognitive control" OR SU "cognitive control") OR (TI "executive control" OR AB "executive control" OR SU "executive control") OR (TI "executive function" OR AB "executive function" OR SU "executive function"))                                                                                                                                                                                                                                                                                                                                                                                                                                                                                                                                                                                                 | Expanders - Apply<br>equivalent subjects<br>Search modes -<br>Boolean/Phrase | Interface -<br>EBSCOhost<br>Research<br>Databases<br>Search Screen<br>- Basic Search<br>Database -                 | 42,933  |

|     |                                                                                                                                                                                                                                                                                                                                                                                                                                                                                                                                                                                                                                                                  |                                                                        |                                                                                                     |         |
|-----|------------------------------------------------------------------------------------------------------------------------------------------------------------------------------------------------------------------------------------------------------------------------------------------------------------------------------------------------------------------------------------------------------------------------------------------------------------------------------------------------------------------------------------------------------------------------------------------------------------------------------------------------------------------|------------------------------------------------------------------------|-----------------------------------------------------------------------------------------------------|---------|
|     |                                                                                                                                                                                                                                                                                                                                                                                                                                                                                                                                                                                                                                                                  |                                                                        | APA PsycInfo                                                                                        |         |
| S28 | ((TI processing OR AB processing OR SU processing) N3 ((TI rate OR AB rate OR SU rate) OR (TI velocity OR AB velocity OR SU velocity) OR (TI speed OR AB speed OR SU speed)))                                                                                                                                                                                                                                                                                                                                                                                                                                                                                    | Expanders - Apply equivalent subjects<br>Search modes - Boolean/Phrase | Interface - EBSCOhost<br>Research Databases<br>Search Screen - Basic Search Database - APA PsycInfo | 13,447  |
| S29 | ((((TI effect OR AB effect OR SU effect) OR (TI effects OR AB effects OR SU effects) OR (TI factor* OR AB factor* OR SU factor*) OR (TI process* OR AB process* OR SU process*)) AND ((TI "problem solving" OR AB "problem solving" OR SU "problem solving") OR (TI decision OR AB decision OR SU decision) OR (TI judgment* OR AB judgment* OR SU judgment*) OR (TI judgement* OR AB judgement* OR SU judgement*) OR (TI "choice making" OR AB "choice making" OR SU "choice making") OR (TI decisionmaking OR AB decisionmaking OR SU decisionmaking) OR (TI judgement* OR AB judgement* OR SU judgement*) OR (TI judgment* OR AB judgment* OR SU judgment*))) | Expanders - Apply equivalent subjects<br>Search modes - Boolean/Phrase | Interface - EBSCOhost<br>Research Databases<br>Search Screen - Basic Search Database - APA PsycInfo | 244,898 |
| S30 | ((((TI mental OR AB mental OR SU mental) OR (TI cognitive OR AB cognitive OR SU cognitive) OR (TI intellectual OR AB intellectual OR SU intellectual) OR (TI passive OR AB passive OR SU passive) OR (TI psychological OR AB psychological OR SU psychological) OR (TI perceptual OR AB perceptual OR SU perceptual) OR (TI cerebral                                                                                                                                                                                                                                                                                                                             | Expanders - Apply equivalent subjects<br>Search modes - Boolean/Phrase | Interface - EBSCOhost<br>Research Databases<br>Search Screen - Basic Search Database - APA PsycInfo | 23,713  |

|     |                                                                                                                                                                                                                                                              |                                                                        |                                                                                                        |        |
|-----|--------------------------------------------------------------------------------------------------------------------------------------------------------------------------------------------------------------------------------------------------------------|------------------------------------------------------------------------|--------------------------------------------------------------------------------------------------------|--------|
|     | OR AB cerebral OR SU cerebral) OR (TI brain OR AB brain OR SU brain)) N3 ((TI comprehension OR AB comprehension OR SU comprehension) OR (TI understanding OR AB understanding OR SU understanding) OR (TI readability OR AB readability OR SU readability))) |                                                                        |                                                                                                        |        |
| S31 | (DE "Insomnia")                                                                                                                                                                                                                                              | Expanders - Apply equivalent subjects<br>Search modes - Boolean/Phrase | Interface - EBSCOhost<br>Research Databases<br>Search Screen - Basic Search<br>Database - APA PsycInfo | 8,529  |
| S32 | (DE "Sleep Wake Disorders")                                                                                                                                                                                                                                  | Expanders - Apply equivalent subjects<br>Search modes - Boolean/Phrase | Interface - EBSCOhost<br>Research Databases<br>Search Screen - Basic Search<br>Database - APA PsycInfo | 15,238 |
| S33 | (DE Sleepiness)                                                                                                                                                                                                                                              | Expanders - Apply equivalent subjects<br>Search modes - Boolean/Phrase | Interface - EBSCOhost<br>Research Databases<br>Search Screen - Basic Search<br>Database - APA PsycInfo | 2,728  |
| S34 | (DE Wakefulness)                                                                                                                                                                                                                                             | Expanders - Apply equivalent subjects<br>Search modes -                | Interface - EBSCOhost<br>Research                                                                      | 8,672  |

|     |                                                                               |                                                                              |                                                                                                                    |       |
|-----|-------------------------------------------------------------------------------|------------------------------------------------------------------------------|--------------------------------------------------------------------------------------------------------------------|-------|
|     |                                                                               | Boolean/Phrase                                                               | Databases<br>Search Screen<br>- Basic Search<br>Database -<br>APA PsycInfo                                         |       |
| S35 | (DE "Sleep Quality")                                                          | Expanders - Apply<br>equivalent subjects<br>Search modes -<br>Boolean/Phrase | Interface -<br>EBSCOhost<br>Research<br>Databases<br>Search Screen<br>- Basic Search<br>Database -<br>APA PsycInfo | 3,400 |
| S36 | (DE "Sleep Deprivation")                                                      | Expanders - Apply<br>equivalent subjects<br>Search modes -<br>Boolean/Phrase | Interface -<br>EBSCOhost<br>Research<br>Databases<br>Search Screen<br>- Basic Search<br>Database -<br>APA PsycInfo | 6,667 |
| S37 | (DE Parasomnias) OR (DE "REM Sleep<br>Behavior Disorder") OR (DE "REM Sleep") | Expanders - Apply<br>equivalent subjects<br>Search modes -<br>Boolean/Phrase | Interface -<br>EBSCOhost<br>Research<br>Databases<br>Search Screen<br>- Basic Search<br>Database -<br>APA PsycInfo | 5,662 |
| S38 | (DE "Myoclonus")                                                              | Expanders - Apply<br>equivalent subjects<br>Search modes -<br>Boolean/Phrase | Interface -<br>EBSCOhost<br>Research<br>Databases<br>Search Screen                                                 | 1,378 |

|     |                                                                                                                                                                                                                                                                                                                                                                                                                                                                                                                                                                                                                                                                                                                                                                                                                                                                                                                                                                                                                         |                                                                              |                                                                                                                    |        |
|-----|-------------------------------------------------------------------------------------------------------------------------------------------------------------------------------------------------------------------------------------------------------------------------------------------------------------------------------------------------------------------------------------------------------------------------------------------------------------------------------------------------------------------------------------------------------------------------------------------------------------------------------------------------------------------------------------------------------------------------------------------------------------------------------------------------------------------------------------------------------------------------------------------------------------------------------------------------------------------------------------------------------------------------|------------------------------------------------------------------------------|--------------------------------------------------------------------------------------------------------------------|--------|
|     |                                                                                                                                                                                                                                                                                                                                                                                                                                                                                                                                                                                                                                                                                                                                                                                                                                                                                                                                                                                                                         |                                                                              | - Basic Search<br>Database -<br>APA PsycInfo                                                                       |        |
| S39 | (DE "Sleep Apnea")                                                                                                                                                                                                                                                                                                                                                                                                                                                                                                                                                                                                                                                                                                                                                                                                                                                                                                                                                                                                      | Expanders - Apply<br>equivalent subjects<br>Search modes -<br>Boolean/Phrase | Interface -<br>EBSCOhost<br>Research<br>Databases<br>Search Screen<br>- Basic Search<br>Database -<br>APA PsycInfo | 3,862  |
| S40 | ((TI sleep* OR AB sleep* OR SU sleep*) N3<br>((TI behav* OR AB behav* OR SU behav*)<br>OR (TI deficit OR AB deficit OR SU deficit)<br>OR (TI deprivation OR AB deprivation OR SU<br>deprivation) OR (TI difficul* OR AB difficul*<br>OR SU difficul*) OR (TI disorder* OR AB<br>disorder* OR SU disorder*) OR (TI disrupt*<br>OR AB disrupt* OR SU disrupt*) OR (TI<br>disturb* OR AB disturb* OR SU disturb*) OR<br>(TI duration OR AB duration OR SU duration)<br>OR (TI impairment OR AB impairment OR SU<br>impairment) OR (TI inability OR AB inability<br>OR SU inability) OR (TI initiation OR AB<br>initiation OR SU initiation) OR (TI issue* OR<br>AB issue* OR SU issue*) OR (TI problem*<br>OR AB problem* OR SU problem*) OR (TI<br>maintenance OR AB maintenance OR SU<br>maintenance) OR (TI practice* OR AB<br>practice* OR SU practice*) OR (TI quality OR<br>AB quality OR SU quality) OR (TI recovery<br>OR AB recovery OR SU recovery) OR (TI<br>resistance OR AB resistance OR SU<br>resistance))) | Expanders - Apply<br>equivalent subjects<br>Search modes -<br>Boolean/Phrase | Interface -<br>EBSCOhost<br>Research<br>Databases<br>Search Screen<br>- Basic Search<br>Database -<br>APA PsycInfo | 55,990 |

|     |                                                                                                                                                                                                                                                                                                                                                                                                                                                                                                                                                                                                                                                                                                                                       |                                                                        |                                                                                                     |        |
|-----|---------------------------------------------------------------------------------------------------------------------------------------------------------------------------------------------------------------------------------------------------------------------------------------------------------------------------------------------------------------------------------------------------------------------------------------------------------------------------------------------------------------------------------------------------------------------------------------------------------------------------------------------------------------------------------------------------------------------------------------|------------------------------------------------------------------------|-----------------------------------------------------------------------------------------------------|--------|
| S41 | ((TI dyssomnia* OR AB dyssomnia* OR SU dyssomnia*) OR (TI insomnia* OR AB insomnia* OR SU insomnia*) OR (TI parasomnia* OR AB parasomnia* OR SU parasomnia*))                                                                                                                                                                                                                                                                                                                                                                                                                                                                                                                                                                         | Expanders - Apply equivalent subjects<br>Search modes - Boolean/Phrase | Interface - EBSCOhost<br>Research Databases<br>Search Screen - Basic Search Database - APA PsycInfo | 17,287 |
| S42 | ((TI "rapid eye movement behav*" OR AB "rapid eye movement behav*" OR SU "rapid eye movement behav*") OR (TI RBD OR AB RBD OR SU RBD) OR (TI "REM behavior disorder*" OR AB "REM behavior disorder*" OR SU "REM behavior disorder*") OR (TI "REM behav*" OR AB "REM behav*" OR SU "REM behav*") OR (TI "REM sleep behav*" OR AB "REM sleep behav*" OR SU "REM sleep behav*"))                                                                                                                                                                                                                                                                                                                                                         | Expanders - Apply equivalent subjects<br>Search modes - Boolean/Phrase | Interface - EBSCOhost<br>Research Databases<br>Search Screen - Basic Search Database - APA PsycInfo | 1,887  |
| S43 | ((TI "circadian rhythm*" OR AB "circadian rhythm*" OR SU "circadian rhythm*") OR (TI "circadian variation" OR AB "circadian variation" OR SU "circadian variation") OR (TI "diurnal cycle" OR AB "diurnal cycle" OR SU "diurnal cycle") OR (TI "diurnal fluctuation" OR AB "diurnal fluctuation" OR SU "diurnal fluctuation") OR (TI "diurnal pattern" OR AB "diurnal pattern" OR SU "diurnal pattern") OR (TI "diurnal rhythm*" OR AB "diurnal rhythm*" OR SU "diurnal rhythm*") OR (TI "diurnal variation" OR AB "diurnal variation" OR SU "diurnal variation") OR (TI nyctohemeral OR AB nyctohemeral OR SU nyctohemeral) OR (TI nycthemeral OR AB nycthemeral OR SU nycthemeral) OR (TI "twenty-four hour rhythm*" OR AB "twenty- | Expanders - Apply equivalent subjects<br>Search modes - Boolean/Phrase | Interface - EBSCOhost<br>Research Databases<br>Search Screen - Basic Search Database - APA PsycInfo | 20,587 |

|     |                                                                                                                                                                                                                                                                                                                                                                                                                                                                                                                                                                                                                                                       |                                                                        |                                                                                                     |        |
|-----|-------------------------------------------------------------------------------------------------------------------------------------------------------------------------------------------------------------------------------------------------------------------------------------------------------------------------------------------------------------------------------------------------------------------------------------------------------------------------------------------------------------------------------------------------------------------------------------------------------------------------------------------------------|------------------------------------------------------------------------|-----------------------------------------------------------------------------------------------------|--------|
|     | four hour rhythm*" OR SU "twenty-four hour rhythm*"))                                                                                                                                                                                                                                                                                                                                                                                                                                                                                                                                                                                                 |                                                                        |                                                                                                     |        |
| S44 | ((TI "myoclonus during sleep" OR AB "myoclonus during sleep" OR SU "myoclonus during sleep") OR (TI "nocturnal myoclonus" OR AB "nocturnal myoclonus" OR SU "nocturnal myoclonus") OR (TI "nocturnal myoclonus syndrome" OR AB "nocturnal myoclonus syndrome" OR SU "nocturnal myoclonus syndrome") OR (TI "periodic leg movement*" OR AB "periodic leg movement*" OR SU "periodic leg movement*") OR (TI "periodic limb movement*" OR AB "periodic limb movement*" OR SU "periodic limb movement*") OR (TI PLMD OR AB PLMD OR SU PLMD) OR (TI PLMS OR AB PLMS OR SU PLMS) OR (TI "sleep myoclonus" OR AB "sleep myoclonus" OR SU "sleep myoclonus")) | Expanders - Apply equivalent subjects<br>Search modes - Boolean/Phrase | Interface - EBSCOhost<br>Research Databases<br>Search Screen - Basic Search Database - APA PsycInfo | 1,061  |
| S45 | ((TI "obstructive apnea*" OR AB "obstructive apnea*" OR SU "obstructive apnea*") OR (TI "obstructive apnoe*" OR AB "obstructive apnoe*" OR SU "obstructive apnoe*") OR (TI "sleep apnea" OR AB "sleep apnea" OR SU "sleep apnea") OR (TI "sleep apno*" OR AB "sleep apno*" OR SU "sleep apno*") OR (TI "sleep hypopnea*" OR AB "sleep hypopnea*" OR SU "sleep hypopnea*") OR (TI "sleep-disordered breathing" OR AB "sleep-disordered breathing" OR SU "sleep-disordered breathing") OR (TI "OSAHS" OR AB "OSAHS" OR SU "OSAHS"))                                                                                                                     | Expanders - Apply equivalent subjects<br>Search modes - Boolean/Phrase | Interface - EBSCOhost<br>Research Databases<br>Search Screen - Basic Search Database - APA PsycInfo | 6,658  |
| S46 | ((TI Waking-up OR AB Waking-up OR SU Waking-up) OR (((TI early OR AB early OR                                                                                                                                                                                                                                                                                                                                                                                                                                                                                                                                                                         | Expanders - Apply equivalent subjects                                  | Interface - EBSCOhost                                                                               | 30,085 |



|     |                                                                                                                                                                                                                                                                                                                                                                             |                                                                              |                                                                                                                    |         |
|-----|-----------------------------------------------------------------------------------------------------------------------------------------------------------------------------------------------------------------------------------------------------------------------------------------------------------------------------------------------------------------------------|------------------------------------------------------------------------------|--------------------------------------------------------------------------------------------------------------------|---------|
|     | SU early) OR (TI sleep* OR AB sleep* OR SU sleep*) OR (TI night* OR AB night* OR SU night*) OR (TI nocturnal OR AB nocturnal OR SU nocturnal) OR (TI prolonged OR AB prolonged OR SU prolonged)) N3 ((TI awake* OR AB awake* OR SU awake*) OR (TI wake* OR AB wake* OR SU wake*) OR (TI waking* OR AB waking* OR SU waking*) OR (TI awaking OR AB awaking OR SU awaking)))) | Search modes -<br>Boolean/Phrase                                             | Research<br>Databases<br>Search Screen<br>- Basic Search<br>Database -<br>APA PsycInfo                             |         |
| S47 | ((TI "poor sleep" OR AB "poor sleep" OR SU "poor sleep") OR (TI "sleep qualit*" OR AB "sleep qualit*" OR SU "sleep qualit*"))                                                                                                                                                                                                                                               | Expanders - Apply<br>equivalent subjects<br>Search modes -<br>Boolean/Phrase | Interface -<br>EBSCOhost<br>Research<br>Databases<br>Search Screen<br>- Basic Search<br>Database -<br>APA PsycInfo | 11,943  |
| S48 | ((TI hypersomnolence OR AB hypersomnolence OR SU hypersomnolence) OR (TI somnolence OR AB somnolence OR SU somnolence) OR (TI sleepiness OR AB sleepiness OR SU sleepiness))                                                                                                                                                                                                | Expanders - Apply<br>equivalent subjects<br>Search modes -<br>Boolean/Phrase | Interface -<br>EBSCOhost<br>Research<br>Databases<br>Search Screen<br>- Basic Search<br>Database -<br>APA PsycInfo | 9,700   |
| S49 | S5 OR S6 S7 OR S8 OR S9 OR S10 OR S11 OR S12 OR S13 OR S14 OR S15 OR S16 OR S17 OR S18 OR S19 OR S20 OR S21 OR S22 OR S23 OR S24 OR S25 OR S26 OR S27 OR S28 OR S29 OR S30 OR S31 OR S32 OR S33 OR S34 OR S35 OR S36 OR S37 OR S38 OR S39 OR S40 OR S41 OR S42 OR S43 OR S44 OR S45 OR S46 OR S47 OR S48 OR S48                                                             | Expanders - Apply<br>equivalent subjects<br>Search modes -<br>Boolean/Phrase | Interface -<br>EBSCOhost<br>Research<br>Databases<br>Search Screen<br>- Basic Search<br>Database -<br>APA PsycInfo | 799,874 |
| S50 | S4 and S49                                                                                                                                                                                                                                                                                                                                                                  | Expanders - Apply                                                            | Interface -                                                                                                        | 58      |

|  |  |                                                         |                                                                                                     |  |
|--|--|---------------------------------------------------------|-----------------------------------------------------------------------------------------------------|--|
|  |  | equivalent subjects<br>Search modes -<br>Boolean/Phrase | EBSCOhost<br>Research<br>Databases<br>Search Screen<br>- Basic Search<br>Database -<br>APA PsycInfo |  |
|--|--|---------------------------------------------------------|-----------------------------------------------------------------------------------------------------|--|

**Scopus database** (Run on November 13, 2023, 973 results)

(TITLE-ABS-KEY ((celiac OR coeliac) W/3 (disease OR sprue OR syndrome)) OR TITLE-ABS-KEY((gluten\* W/3 (enteropath\* OR induced OR intolerance OR sensitiv\*)) OR "gluten-free diet")) AND ( TITLE-ABS-KEY ((neurocognitive OR neuro-cognitive) W/3 (dysfunction OR disorder\* OR impairment\* OR symptom\* OR syndrome)) OR TITLE-ABS-KEY((cognitive OR cognition) W/3 (defect\* OR deficit\* OR disabilit\* OR dissonance\* OR dysfunction\* OR disorder\* OR impairment\* OR syndrome\*)) OR TITLE-ABS-KEY((fatigue) W/3 (chronic OR disorder\* OR multidimensional OR severe OR syndrome\* OR unidimensional )) OR TITLE-ABS-KEY((brain OR cognitive OR mental OR mind ) W/3 (fatigue OR tiredness OR exhaustion )) OR TITLE-ABS-KEY((brain OR cognitive OR mental OR mind ) W/3 (fog OR fogginess OR foggy OR fuzzy)) OR TITLE-ABS-KEY((clouded OR cloudy OR clouding) W/3 (consciousness OR mind OR mental)) OR TITLE-ABS-KEY(consciousness\* ) OR TITLE-ABS-KEY((effect OR effects OR factor\* OR process\*) AND (amnesia\* OR amnesic OR forgetting OR memory OR memorizing OR remembering OR reminiscence OR "mental recall" OR forgetting)) OR TITLE-ABS-KEY("memory deficit" OR "memory loss" OR "memory disorder\*") OR TITLE-ABS-KEY("cognitive control" OR "executive control" OR "executive function") OR TITLE-ABS-KEY(processing W/3 (rate OR velocity OR speed)) OR TITLE-ABS-KEY((effect OR effects OR factor\* OR process\*) AND ("problem solving" OR decision OR judgment\* OR judgement\* OR "choice making" OR decisionmaking OR judgement\* OR judgment\*)) OR TITLE-ABS-KEY((mental OR cognitive OR intellectual OR passive OR psychological OR perceptual OR cerebral OR brain) W/3 (comprehension OR understanding OR readability)) OR TITLE-ABS-KEY(sleep\* W/3 (behav\* OR deficit OR deprivation OR difficul\* OR disorder\* OR disrupt\* OR disturb\* OR duration OR impairment OR inability OR initiation OR issue\* OR problem\* OR maintenance OR practice\* OR quality OR recovery OR resistance)) OR TITLE-ABS-KEY(dyssomnia\* OR insomnia\* OR parasomnia\* OR "rapid eye movement behav\*" OR RBD OR "REM behavior disorder\*" OR "REM behav\*" OR "REM sleep behav\*" OR "circadian rhythm\*" OR "circadian variation" OR "diurnal cycle" OR "diurnal fluctuation" OR "diurnal pattern" OR "diurnal rhythm\*" OR "diurnal variation" OR nyctohemeral OR nycthemeral OR "twenty-four hour rhythm\*" OR "myoclonus during sleep" OR "nocturnal myoclonus" OR "nocturnal myoclonus syndrome" OR "periodic leg movement\*" OR "periodic limb movement\*" OR {PLMD} OR {PLMS} OR "sleep myoclonus" OR "obstructive apnea\*" OR "obstructive apnoe\*" OR "sleep apnea" OR "sleep apno\*" OR "sleep hypopnea\*" OR "sleep-disordered breathing" OR {OSAHS} OR Waking-up OR ((early OR sleep\* OR night\* OR nocturnal OR prolonged) W/3 (awake\* OR wake\* OR waking\* OR awaking)) OR "poor sleep" OR "sleep qualit\*" OR hypersomnolence OR somnolence OR sleepiness) )

**Web of Science Core Collection** (Run on November 13, 2023, 368 results)

(TS= ((celiac OR coeliac) NEAR/3 (disease OR sprue OR syndrome)) OR TS=((gluten\* NEAR/3 (enteropath\* OR induced OR intolerance OR sensitiv\*)) OR "gluten-free diet")) AND ( TS= ((neurocognitive OR neuro-cognitive) NEAR/3 (dysfunction OR disorder\* OR impairment\* OR symptom\* OR syndrome)) OR TS=((cognitive OR cognition) NEAR/3 (defect\* OR deficit\* OR disabilit\* OR dissonance\* OR dysfunction\* OR disorder\* OR impairment\* OR syndrome\*)) OR TS=(fatigue NEAR/3 (syndrome\* OR disorder\*)) OR TS=(fatigue NEAR/3 (chronic OR disorder\* OR multidimensional OR severe OR syndrome\* OR unidimensional )) OR TS=((brain OR cognitive OR mental OR mind ) NEAR/3 (fatigue OR tiredness OR exhaustion )) OR TS=((brain OR cognitive OR mental OR mind ) NEAR/3 (fog OR fogginess OR foggy OR fuzzy )) OR TS=(consciousness\* ) OR TS=((effect OR effects OR factor\* OR process\*) AND (amnesia\* OR amnesic OR forgetting OR memory OR memorizing OR remembering OR reminiscence OR "mental recall")) OR TS=("memory deficit" OR "memory loss" OR "memory disorder\*") OR TS=("cognitive control" OR "executive control" OR "executive function") OR TS=(processing NEAR/3 (rate OR velocity OR speed)) OR TS=((effect OR effects OR factor\* OR process\*) AND ("problem solving" OR decision OR judgment\* OR judgement\* OR "choice making" OR decisionmaking OR judgement\* OR judgment\*)) OR TS=((mental OR cognitive OR intellectual OR passive OR psychological OR perceptual OR cerebral OR brain) NEAR/3 (comprehension OR understanding OR readability)) OR TS=(sleep\* NEAR/3 (behav\* OR deficit OR deprivation OR difficul\* OR disorder\* OR disrupt\* OR disturb\* OR duration OR impairment OR inability OR initiation OR issue\* OR problem\* OR maintenance OR practice\* OR quality OR recovery OR resistance)) OR TS=(dyssomnia\* OR insomnia\* OR parasomnia\* OR "rapid eye movement behav\*" OR RBD OR "REM behavior disorder\*" OR "REM behav\*" OR "REM sleep behav\*" OR "circadian rhythm\*" OR "circadian variation" OR "diurnal cycle" OR "diurnal fluctuation" OR "diurnal pattern" OR "diurnal rhythm\*" OR "diurnal variation" OR nyctohemeral OR nycthemeral OR "twenty-four hour rhythm\*" OR "myoclonus during sleep" OR "nocturnal myoclonus" OR "nocturnal myoclonus syndrome" OR "periodic leg movement\*" OR "periodic limb movement\*" OR PLMD OR PLMS OR "sleep myoclonus" OR "obstructive apnea\*" OR "obstructive apnoe\*" OR "sleep apnea" OR "sleep apno\*" OR "sleep hypopnea\*" OR "sleep-disordered breathing" OR OSAHS OR Waking-up OR ((early OR sleep\* OR night\* OR nocturnal OR prolonged) NEAR/3 (awake\* OR wake\* OR waking\* OR awaking)) OR "poor sleep" OR "sleep qualit\*" OR hypersomnolence OR somnolence OR sleepiness) )
